# Supplementary material
Source: PubMed Central journal article supplement (PMC4309721)
Supplement: AEM.03028-14_zam999116024so1.pdf [file AEM.03028-14_zam999116024so1.pdf]

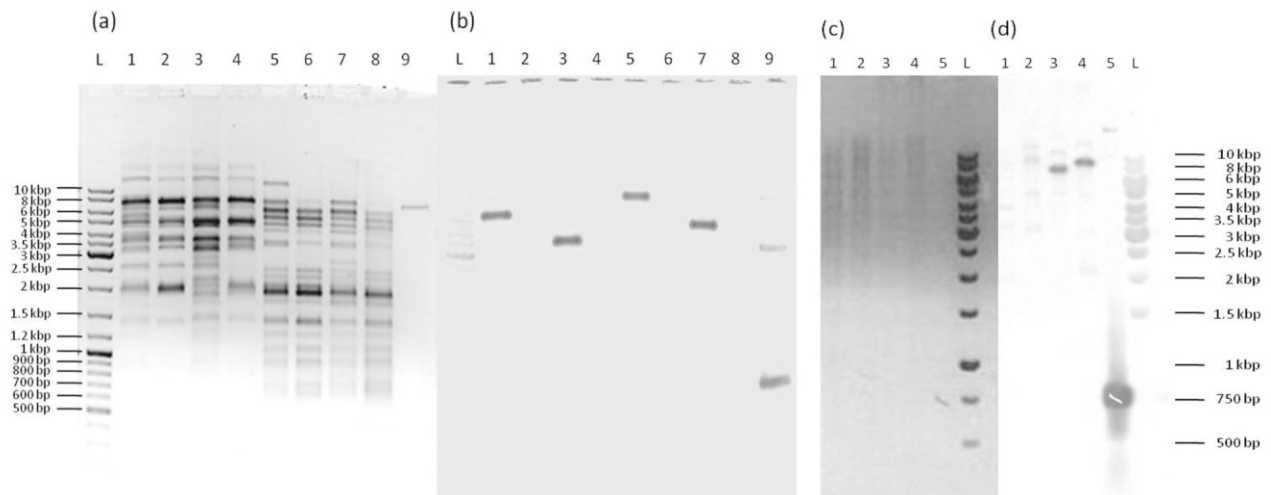

**Figure 1S.** (a) The electrophoresis of total plasmid DNA of the strain *L. paraplantarum* BGCG11 (pCG11) and its EPS-CG11 minus derivative NB1 (pNB1), digested with different restriction enzymes, (b) Southern blot hybridization of digested plasmid DNA with the DNA probe from *eps* gene cluster (clone pAZIL -E650) L -GeneRuler DNA Ladder mix, 1 - pCG11 digested with *SpeI* restriction enzyme (pCG11/*SpeI*), 2 - pNB1 digested with *SpeI* (pNB1/*SpeI*), 3 - pCG11 digested with *SpeI/BamHI* restriction enzymes, 4 - pNB1 digested with *SpeI/BamHI*, 5 - pCG11 digested with *BclI* restriction enzyme, 6 - pNB1 digested with *BclI*, 7 - pCG11 digested with *BclI/BamHI* restriction enzymes, 8 - pNB1 digested with *BclI/BamHI*, 9 - DNA probe - *EcoRI* fragment from pAZIL-E650 construct; (c) The electrophoresis of total DNA of the strain *L. paraplantarum* BGCG11 and its derivative NB1 digested with different restriction enzymes, (d) Southern blot hybridization of digested DNA with the DNA probe complementary to the *rfbB* gene: 1 – total DNA of NB1 digested with *HindIII*, 2 – total DNA of NB1 digested with *EcoRI*, 3 – total DNA of BGCG11 digested with *HindIII*, 4 – total DNA of BGCG11 digested with *EcoRI*, 5 – DNA probe, L - GeneRuler 1 kb DNA Ladder.

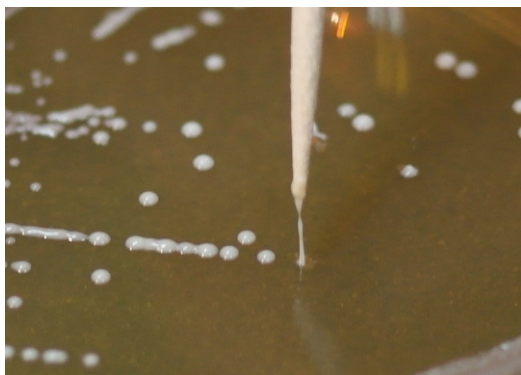

**Figure 2S.** Part of MRS Petri dishes with grown colonies of *Lactobacillus paraplantarum* BGCG11. One colony was touched with sterile toothpick to demonstrate expression of ropy phenotype.
